# Supplementary material for: Pediatric Brain Tumors: Signatures from the Intact Proteome
Source: MDPI journal article supplement (doi:10.3390/ijms23063196), 2022-03-16
Supplement: s1 [file s1]

A

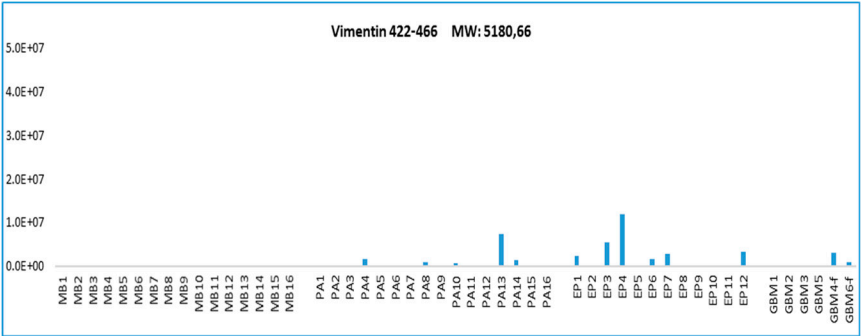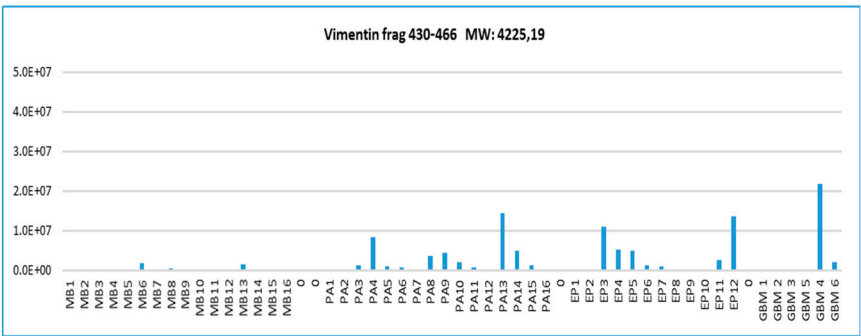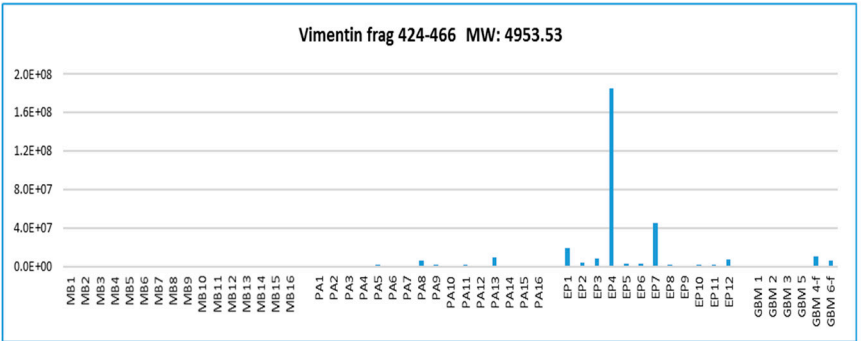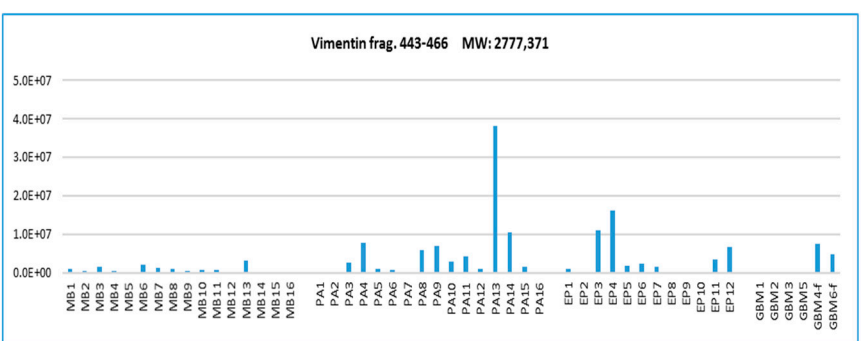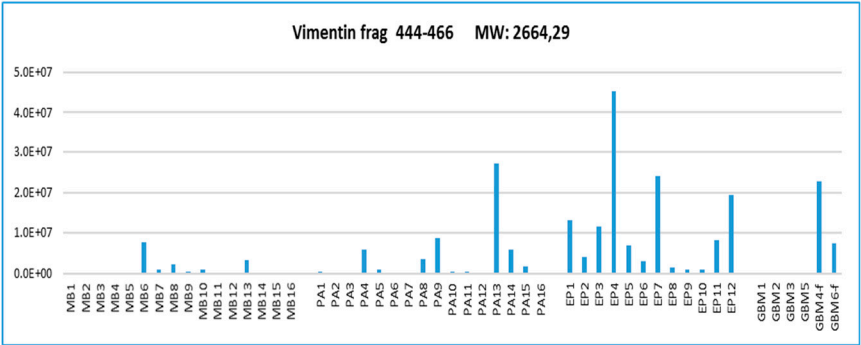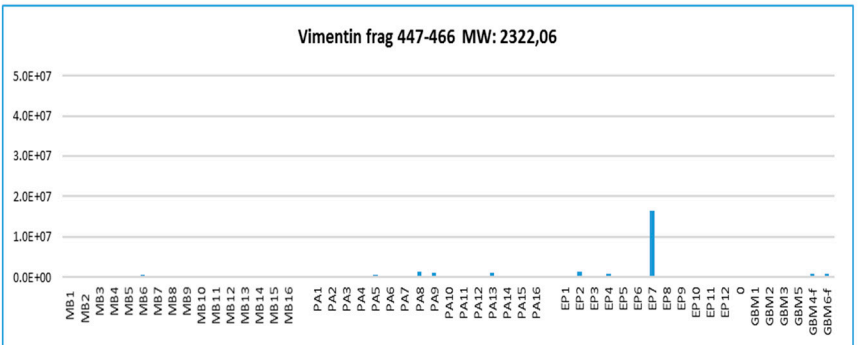

B

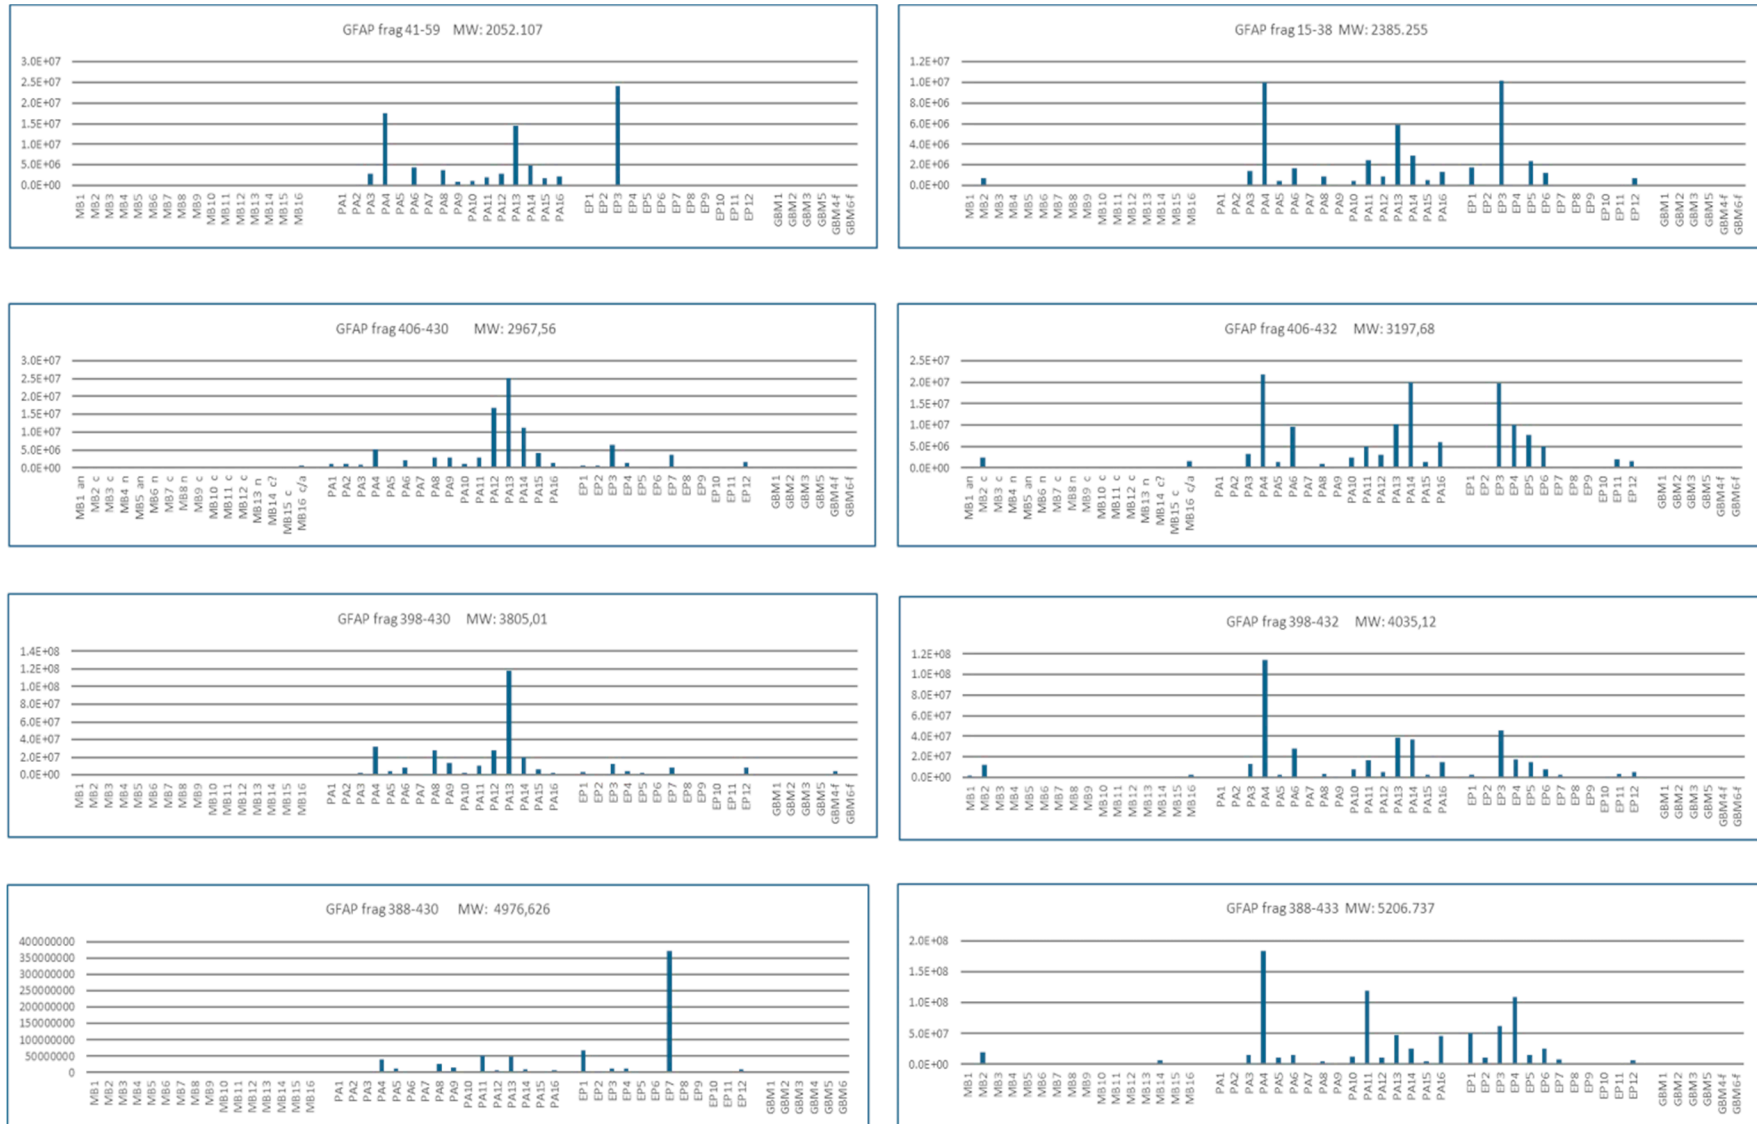

**Supplementary Figure S1.** Distribution of vimentin (panel A) and GFAP (panel B) fragment peptides within the tumor tissue analyzed. In y axis the XIC peak area values are reported.

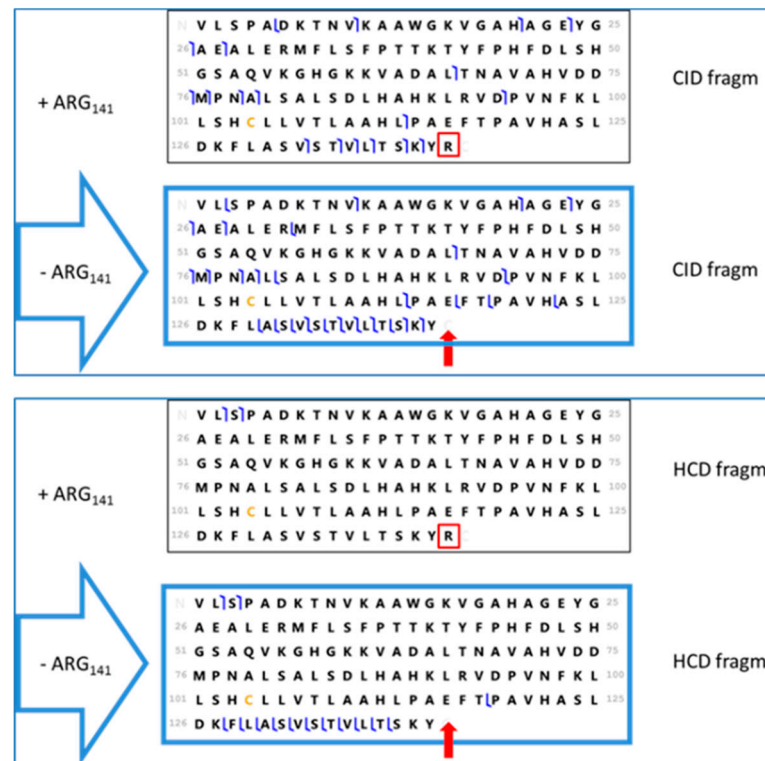

**Supplementary Figure S2.** Sequence coverage data for des-Arg  $\alpha$ Hb chain identification as resulting by Prosight light comparison of the experimental tandem MS spectra data obtained by CID (upper panels) and HCD (lower panels) fragmentation in comparison to theoretical MS/MS data of both full length and des-Arg  $\alpha$ Hb chain.
